# Supplementary material
Source: publisher figshare collection journal article supplement (https://acs.figshare.com/ndownloader/files/5807895)
Supplement: Supplementary file 1 [file 5807895]

=====

SUPPLEMENTARY MATERIAL

=====

BELONGING TO THE PAPER

**Homo-Arcyriaflavin: The Synthesis of Ring-expanded  
Arcyriaflavin Analogs**

by

Siavosh Mahboobi, Stefan Dove, Sabine Kuhr and Alfred Popp

$C_{26}H_{24}N_4O_2 \cdot CH_3OH$  compound 31

---

Experimental

Compound 31

Crystal data

$C_{27}H_{28}N_4O_3$

$M_r = 456.53$

Kristallsystem: monoclinic

Raumgruppe:  $P2_1/n$

$a = 10.8085 (7) \text{ \AA}$

$b = 20.1630 (10) \text{ \AA}$

$c = 10.9501 (9) \text{ \AA}$

$\alpha = 90.000 (5)^\circ$

$\beta = 103.027 (8)^\circ$

$\gamma = 90.000 (5)^\circ$

$V = 2325.0 (3) \text{ \AA}^3$

$Z = 2$

$D_x = 1.304 \text{ Mg m}^{-3}$

$D_m = \text{yes} \text{ Mg m}^{-3}$

yes

Mo K  $\alpha$

$\lambda = 0.71069 \text{ \AA}$

$m = 0.087 \text{ mm}^{-1}$

$T = 150 (1) \text{ K}$

0.320 x 0.080 x 0.040 mm  
Farbe: dark red

---

#### Data collection

Stoe --IPDS, plate distance 73 mm  
140 plates, phi increment 1.0 °  
Absorption correction: none  
11418 measured reflections  
4001 independent reflections  
1300 observed reflections  
Criterion:  $>2\sigma(I)$   $I > 2 s(I)$   
Rint = 0.1138  
 $\langle\theta\rangle_{\max} = 25.04^\circ$   
h = -12 -> 12  
k = -23 -> 23  
l = -13 -> 12  
intensity variation: 0 %

---

#### Refinement

Refinement on  $F^2$   
Final R = 0.0451  
wR = 0.0694  
S = 0.911  
4001 reflections  
324 parameters  
riding atoms (Abstand für die H-Atome frei)  
 $w = \text{calc } w=1/[\sigma(F_o^2) + (0.0132P)^2 + 0.0000P^2]$  where  
 $P=(F_o^2+2F_c^2)/3$   
d / s<sub>max</sub> = -0.001  
Extinction correction: none  
Atomic scattering factors from International Tables Vol C Tables 4.2.6.8 and 6.1.1.4

Data collection: Stoe --IPDS software version 2.78 (Stoe , 1997)  
Cell refinement: Stoe --IPDS software version 2.78 (Stoe , 1997)  
Data reduction: Stoe --IPDS software version 2.78 (Stoe , 1997)  
Program used to solve structure: SIR-92 (Altomare, 1990) (direkte Methode)  
Program used to refine structure: SHELXL-93 (Sheldrick, 1993)  
Molecular graphics: PLATON (Speck 1992)  
Software used to prepare material for publication

## ----- Table of coordinates -----

Table. Fractional atomic coordinates and equivalent isotropic thermal parameters ( $\text{\AA}^2$ )

$$U_{eq} = 1/3 \langle \sum_i \langle \sum_j U_{ij} a_j^* \cdot a_i \rangle \rangle$$

|      | x           | y            | z          | $U_{eq}$    |
|------|-------------|--------------|------------|-------------|
| O001 | -0.1931 (2) | 0.20141 (13) | 1.0186 (2) | 0.0355 (7)  |
| O002 | -0.4985 (3) | 0.04761 (12) | 0.8678 (3) | 0.0376 (7)  |
| N001 | -0.0347 (3) | 0.17357 (13) | 0.6078 (3) | 0.0288 (9)  |
| N002 | -0.3112 (3) | 0.02061 (15) | 0.4760 (3) | 0.0279 (8)  |
| N003 | -0.3627 (3) | 0.12954 (15) | 0.9652 (3) | 0.0279 (8)  |
| N004 | -0.1057 (3) | 0.0349 (15)  | 0.2434 (3) | 0.0307 (9)  |
| C001 | 0.0562 (4)  | 0.1835 (2)   | 0.7171 (4) | 0.0273 (10) |
| C002 | 0.1850 (4)  | 0.1983 (2)   | 0.7337 (4) | 0.0326 (12) |
| C003 | 0.2569 (4)  | 0.2024 (2)   | 0.8549 (4) | 0.0370 (12) |
| C004 | 0.2012 (4)  | 0.1921 (2)   | 0.9567 (4) | 0.0360 (12) |
| C005 | 0.0740 (4)  | 0.1789 (2)   | 0.9408 (4) | 0.0302 (11) |
| C006 | -0.0021 (4) | 0.1749 (2)   | 0.8185 (4) | 0.0254 (10) |
| C007 | -0.1337 (4) | 0.1579 (2)   | 0.7658 (3) | 0.0231 (9)  |
| C008 | -0.2334 (3) | 0.1361 (2)   | 0.8241 (3) | 0.0240 (9)  |
| C009 | -0.3226 (4) | 0.0886 (2)   | 0.7810 (3) | 0.0243 (10) |
| C010 | -0.3332 (3) | 0.0479 (2)   | 0.6703 (3) | 0.0236 (10) |
| C011 | -0.3619 (3) | -0.0221 (2)  | 0.6507 (4) | 0.0262 (10) |
| C012 | -0.3909 (3) | -0.0732 (2)  | 0.7261 (4) | 0.0283 (10) |
| C013 | -0.4078 (4) | -0.1366 (2)  | 0.6765 (4) | 0.0355 (11) |
| C014 | -0.3954 (4) | -0.1499 (2)  | 0.5549 (4) | 0.0369 (12) |
| C015 | -0.3646 (3) | -0.1009 (2)  | 0.4782 (4) | 0.0324 (11) |
| C016 | -0.3477 (3) | -0.0370 (2)  | 0.5297 (4) | 0.0269 (10) |
| C017 | -0.3029 (3) | 0.0712 (2)   | 0.5622 (4) | 0.0252 (10) |
| C018 | -0.2660 (3) | 0.1419 (2)   | 0.5407 (3) | 0.0278 (10) |
| C019 | -0.1483 (4) | 0.1576 (2)   | 0.6372 (4) | 0.0251 (10) |
| C020 | -0.2839 (3) | 0.0255 (2)   | 0.3519 (4) | 0.0300 (11) |
| C021 | -0.1450 (4) | 0.0104 (2)   | 0.3554 (4) | 0.0328 (11) |
| C022 | -0.1784 (4) | 0.0025 (2)   | 0.1295 (4) | 0.0423 (13) |
| C023 | 0.0313 (4)  | 0.0197 (2)   | 0.2576 (4) | 0.0449 (13) |
| C024 | -0.2545 (4) | 0.1617 (2)   | 0.9468 (4) | 0.0261 (10) |
| C025 | -0.4074 (4) | 0.0831 (2)   | 0.8713 (4) | 0.0267 (10) |
| C026 | -0.4173 (4) | 0.1409 (2)   | 0.0735 (4) | 0.0408 (12) |
| C027 | 0.0431 (4)  | 0.2015 (2)   | 0.2891 (4) | 0.0493 (14) |
| O003 | -0.0423 (3) | 0.1647 (13)  | 0.3463 (3) | 0.0430 (9)  |

## ----- Table of bonds -----

|               |           |               |           |
|---------------|-----------|---------------|-----------|
| O001 --- C024 | 1.211 (4) | C011 --- C012 | 1.401 (5) |
| O002 --- C025 | 1.211 (4) | C011 --- C016 | 1.401 (5) |
| N001 --- C019 | 1.376 (4) | C012 --- C013 | 1.385 (5) |
| N001 --- C001 | 1.381 (4) | C012 --- H012 | 1.000 (4) |
| N001 --- H001 | 0.820 (4) | C013 --- C014 | 1.394 (5) |
| N002 --- C017 | 1.379 (5) | C013 --- H013 | 0.970 (4) |
| N002 --- C016 | 1.398 (5) | C014 --- C015 | 1.385 (5) |
| N002 --- C020 | 1.457 (5) | C014 --- H014 | 0.890 (4) |
| N003 --- C024 | 1.391 (4) | C015 --- C016 | 1.401 (5) |
| N003 --- C025 | 1.394 (4) | C015 --- H015 | 1.000 (4) |
| N003 --- C026 | 1.456 (5) | C017 --- C018 | 1.512 (5) |
| N004 --- C022 | 1.468 (4) | C018 --- C019 | 1.493 (4) |
| N004 --- C021 | 1.470 (5) | C018 --- H01A | 1.030 (2) |
| N004 --- C023 | 1.485 (4) | C018 --- H01B | 1.030 (2) |
| C001 --- C002 | 1.396 (5) | C020 --- C021 | 1.524 (5) |
| C001 --- C006 | 1.406 (5) | C020 --- H02A | 0.990 (2) |
| C002 --- C003 | 1.381 (5) | C020 --- H02B | 0.990 (2) |
| C002 --- H002 | 0.860 (4) | C021 --- H02C | 0.960 (2) |
| C003 --- C004 | 1.397 (5) | C021 --- H02D | 0.960 (2) |
| C003 --- H003 | 0.970 (4) | C022 --- H02E | 0.970 (2) |
| C004 --- C005 | 1.373 (5) | C022 --- H02F | 0.970 (2) |
| C004 --- H004 | 0.950 (4) | C022 --- H02G | 0.970 (2) |
| C005 --- C006 | 1.406 (5) | C023 --- H02H | 0.990 (2) |
| C005 --- H005 | 0.900 (4) | C023 --- H02I | 0.990 (2) |
| C006 --- C007 | 1.450 (5) | C023 --- H02J | 0.990 (2) |
| C007 --- C019 | 1.382 (5) | C026 --- H02K | 0.870 (2) |
| C007 --- C008 | 1.439 (5) | C026 --- H02L | 0.870 (2) |
| C008 --- C009 | 1.365 (5) | C026 --- H02M | 0.870 (2) |
| C008 --- C024 | 1.504 (5) | C027 --- O003 | 1.434 (5) |
| C009 --- C010 | 1.447 (5) | C027 --- H02N | 1.010 (2) |
| C009 --- C025 | 1.496 (5) | C027 --- H02O | 1.010 (2) |
| C010 --- C017 | 1.379 (5) | C027 --- H02P | 1.010 (2) |
| C010 --- C011 | 1.450 (5) | O003 --- H00A | 0.820 (4) |

----- Table of angles -----

|                        |           |
|------------------------|-----------|
| C019 --- N001 --- C001 | 109.2 (3) |
| C019 --- N001 --- H001 | 125.4 (2) |
| C001 --- N001 --- H001 | 125.4 (2) |
| C017 --- N002 --- C016 | 107.9 (3) |
| C017 --- N002 --- C020 | 126.3 (3) |
| C016 --- N002 --- C020 | 125.7 (3) |
| C024 --- N003 --- C025 | 111.6 (3) |
| C024 --- N003 --- C026 | 123.6 (3) |
| C025 --- N003 --- C026 | 124.7 (3) |
| C022 --- N004 --- C021 | 111.1 (3) |
| C022 --- N004 --- C023 | 109.1 (3) |
| C021 --- N004 --- C023 | 108.2 (3) |
| N001 --- C001 --- C002 | 129.6 (4) |
| N001 --- C001 --- C006 | 108.0 (3) |
| C002 --- C001 --- C006 | 122.4 (4) |
| C003 --- C002 --- C001 | 117.8 (4) |
| C003 --- C002 --- H002 | 121.1 (3) |
| C001 --- C002 --- H002 | 121.1 (3) |
| C002 --- C003 --- C004 | 120.5 (4) |
| C002 --- C003 --- H003 | 119.7 (3) |
| C004 --- C003 --- H003 | 119.7 (2) |
| C005 --- C004 --- C003 | 121.8 (4) |
| C005 --- C004 --- H004 | 119.1 (3) |
| C003 --- C004 --- H004 | 119.1 (2) |
| C004 --- C005 --- C006 | 119.1 (4) |
| C004 --- C005 --- H005 | 120.4 (3) |
| C006 --- C005 --- H005 | 120.4 (2) |
| C001 --- C006 --- C005 | 118.3 (4) |
| C001 --- C006 --- C007 | 106.8 (3) |
| C005 --- C006 --- C007 | 134.7 (4) |
| C019 --- C007 --- C008 | 121.8 (3) |
| C019 --- C007 --- C006 | 106.4 (4) |
| C008 --- C007 --- C006 | 131.3 (3) |
| C009 --- C008 --- C007 | 127.0 (4) |
| C009 --- C008 --- C024 | 108.2 (3) |
| C007 --- C008 --- C024 | 124.8 (3) |
| C008 --- C009 --- C010 | 127.1 (4) |
| C008 --- C009 --- C025 | 108.3 (3) |
| C010 --- C009 --- C025 | 124.5 (3) |
| C017 --- C010 --- C009 | 122.4 (3) |
| C017 --- C010 --- C011 | 106.8 (3) |
| C009 --- C010 --- C011 | 130.5 (4) |
| C012 --- C011 --- C016 | 119.1 (3) |
| C012 --- C011 --- C010 | 134.3 (4) |
| C016 --- C011 --- C010 | 106.5 (3) |
| C013 --- C012 --- C011 | 118.4 (4) |
| C013 --- C012 --- H012 | 120.8 (3) |
| C011 --- C012 --- H012 | 120.8 (2) |
| C012 --- C013 --- C014 | 121.3 (4) |

|                        |           |
|------------------------|-----------|
| C012 --- C013 --- H013 | 119.3 (3) |
| C014 --- C013 --- H013 | 119.3 (3) |
| C015 --- C014 --- C013 | 122.0 (4) |
| C015 --- C014 --- H014 | 119.0 (2) |
| C013 --- C014 --- H014 | 119.0 (3) |
| C014 --- C015 --- C016 | 116.1 (4) |
| C014 --- C015 --- H015 | 122.0 (2) |
| C016 --- C015 --- H015 | 122.0 (3) |
| C015 --- C016 --- N002 | 128.2 (4) |
| C015 --- C016 --- C011 | 123.1 (4) |
| N002 --- C016 --- C011 | 108.7 (3) |
| N002 --- C017 --- C010 | 110.1 (3) |
| N002 --- C017 --- C018 | 124.7 (4) |
| C010 --- C017 --- C018 | 125.2 (3) |
| C019 --- C018 --- C017 | 107.6 (3) |
| C019 --- C018 --- H01A | 110.2 (2) |
| C017 --- C018 --- H01A | 110.2 (2) |
| C019 --- C018 --- H01B | 110.2 (2) |
| C017 --- C018 --- H01B | 110.2 (2) |
| H01A --- C018 --- H01B | 108.5     |
| N001 --- C019 --- C007 | 109.6 (3) |
| N001 --- C019 --- C018 | 123.2 (3) |
| C007 --- C019 --- C018 | 127.3 (4) |
| N002 --- C020 --- C021 | 111.6 (3) |
| N002 --- C020 --- H02A | 109.3 (2) |
| C021 --- C020 --- H02A | 109.3 (2) |
| N002 --- C020 --- H02B | 109.3 (2) |
| C021 --- C020 --- H02B | 109.3 (2) |
| H02A --- C020 --- H02B | 108.0     |
| N004 --- C021 --- C020 | 112.3 (3) |
| N004 --- C021 --- H02C | 109.1 (2) |
| C020 --- C021 --- H02C | 109.1 (2) |
| N004 --- C021 --- H02D | 109.1 (2) |
| C020 --- C021 --- H02D | 109.1 (2) |
| H02C --- C021 --- H02D | 107.9     |
| N004 --- C022 --- H02E | 109.5 (2) |
| N004 --- C022 --- H02F | 109.5 (2) |
| H02E --- C022 --- H02F | 109.5     |
| N004 --- C022 --- H02G | 109.5 (2) |
| H02E --- C022 --- H02G | 109.5     |
| H02F --- C022 --- H02G | 109.5     |
| N004 --- C023 --- H02H | 109.5 (2) |
| N004 --- C023 --- H02I | 109.5 (2) |
| H02H --- C023 --- H02I | 109.5     |
| N004 --- C023 --- H02J | 109.5 (2) |
| H02H --- C023 --- H02J | 109.5     |
| H02I --- C023 --- H02J | 109.5     |
| O001 --- C024 --- N003 | 124.7 (4) |
| O001 --- C024 --- C008 | 129.5 (4) |
| N003 --- C024 --- C008 | 105.8 (3) |

|                        |           |
|------------------------|-----------|
| O002 --- C025 --- N003 | 124.4 (4) |
| O002 --- C025 --- C009 | 129.6 (4) |
| N003 --- C025 --- C009 | 106.0 (3) |
| N003 --- C026 --- H02K | 109.5 (2) |
| N003 --- C026 --- H02L | 109.5 (2) |
| H02K --- C026 --- H02L | 109.5     |
| N003 --- C026 --- H02M | 109.5 (2) |
| H02K --- C026 --- H02M | 109.5     |
| H02L --- C026 --- H02M | 109.5     |
| O003 --- C027 --- H02N | 109.5 (2) |
| O003 --- C027 --- H02O | 109.5 (2) |
| H02N --- C027 --- H02O | 109.5     |
| O003 --- C027 --- H02P | 109.5 (2) |
| H02N --- C027 --- H02P | 109.5     |
| H02O --- C027 --- H02P | 109.5     |
| C027 --- O003 --- H00A | 109.5 (2) |

---

Lists of structure factors, anisotropic thermal parameters, H-atom coordinates, and complete geometry have been deposited with the British Library Document Supply Centre as Supplementary Publication No. SUP 00000 (00 pp.). Copies may be obtained through The Technical Editor, International Union of Crystallography, 5 Abbey Square, Chester CH1 2HU, England.

---

#### References

1. Altomare, A., Cascarano, G., Giacovazzo, C. & Guagliardi, A.: Completion and Refinement of Crystal Structures with SIR92. *J. Appl. Cryst.* 26 (1993) 343-350.
2. Sheldrick, G. M. SHELXL93. Program for crystal structure
3. Spek, A. L.: PLATON, *Acta Cryst.* A46 (1990) C34.
4. Stoe -IPDS Software, Version 2.78, Stoe & CIE GmbH, Darmstadt, Germany, 1997.
5. Wilson, A. J. C.: Ed. *International Tables for Crystallography, Volume C*, Kluwer Academic Publishers, Dordrecht, The Netherlands, 1992.
